# Supplementary material for: HupB Is a Bacterial Nucleoid-Associated Protein with an Indispensable Eukaryotic-Like Tail
Source: PubMed Central journal article supplement (PMC5676037; doi:10.1128/mbio.01272-17), 2017-11-07

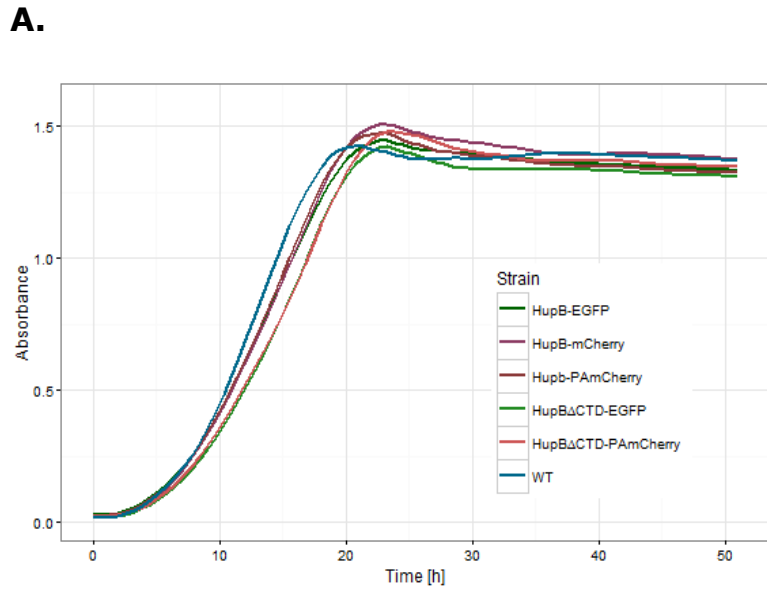

Fig. S1. Hołowka et al., 2017

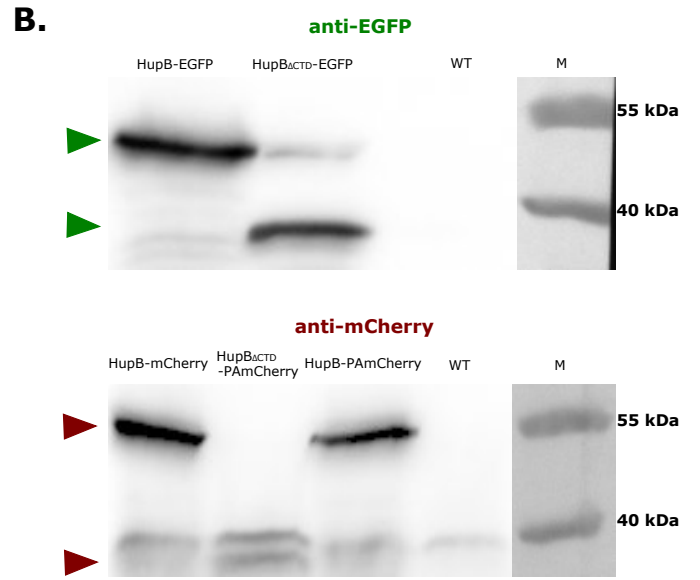

Supplement: mbo006173577sf1.pdf [file mbo006173577sf1.pdf]
