# Supplementary material for: HupB Is a Bacterial Nucleoid-Associated Protein with an Indispensable Eukaryotic-Like Tail
Source: PubMed Central journal article supplement (PMC5676037; doi:10.1128/mbio.01272-17), 2017-11-07
Supplement: mbo006173577sf2.pdf [file mbo006173577sf2.pdf]

**A.**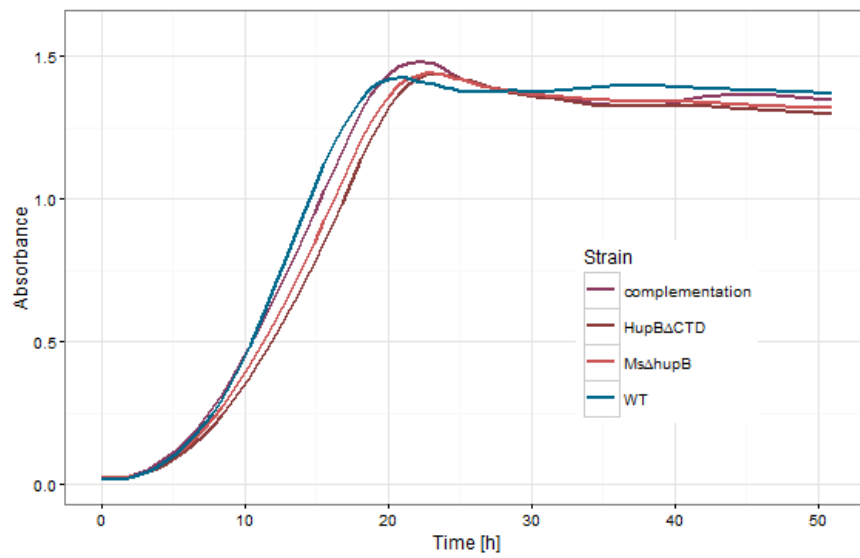**B.**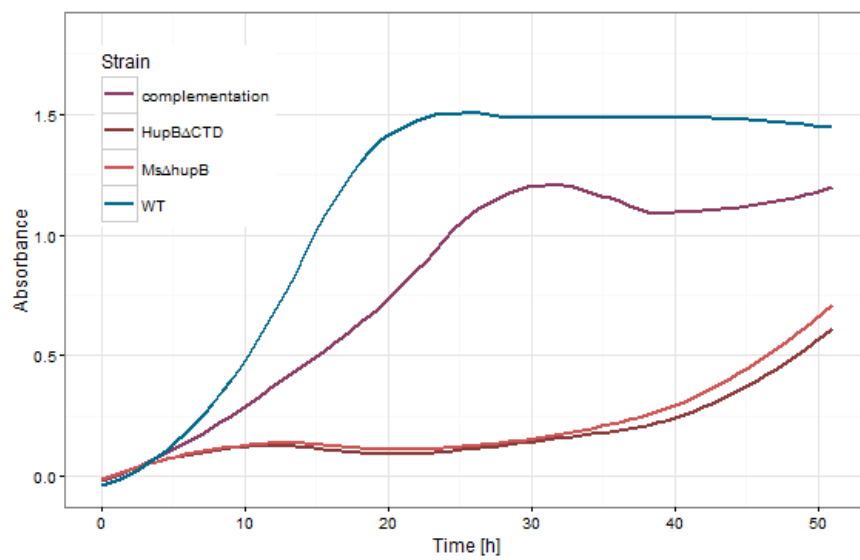

Fig. S2. Hołowka et al., 2017
